# Supplementary material for: Analytical Methods to Characterize and Purify Polymeric Nanoparticles
Source: Hindawi journal article supplement (doi:10.1155/2018/6387826), 2018-08-05
Supplement: f1 [file 6387826.f1.pdf]

## Supplementary information

### Graphical abstract

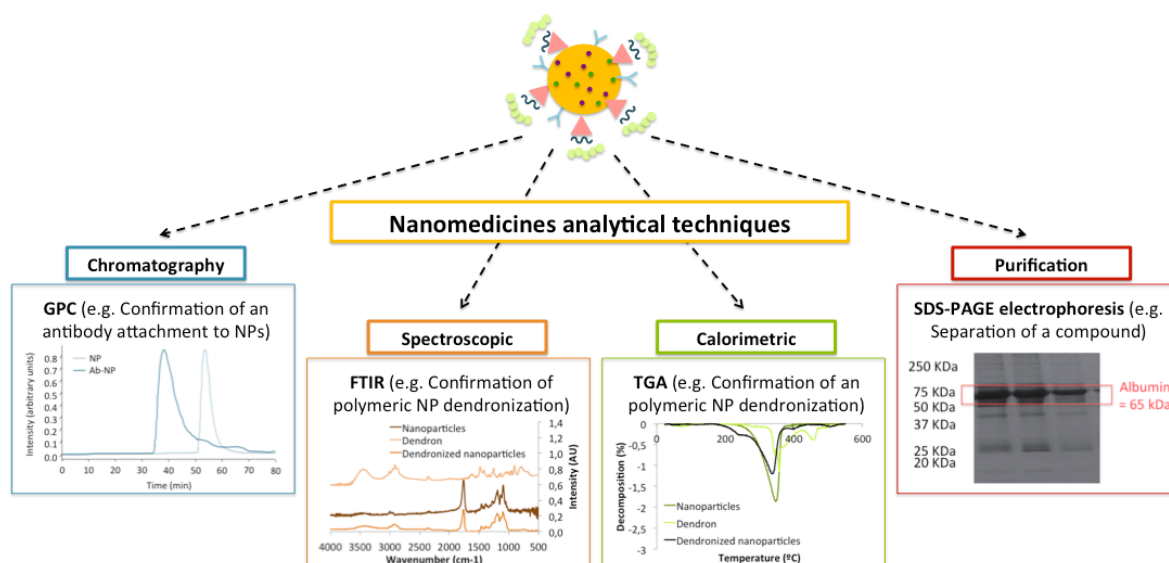

Schematic representation of analytical techniques to characterize a nanoparticle dispersion, as a summary of the whole review.
